# Supplementary material for: Capillary forces between rigid spheres and elastic supports: the role of Young's modulus and equilibrium vapor adsorption
Source: Royal Society of Chemistry journal article supplement (doi:10.1039/c3sm27952a), 2013-01-01
Supplement: c3sm27952a.pdf [file c3sm27952a.pdf]

## Supplementary data

### 1. SFG experiment

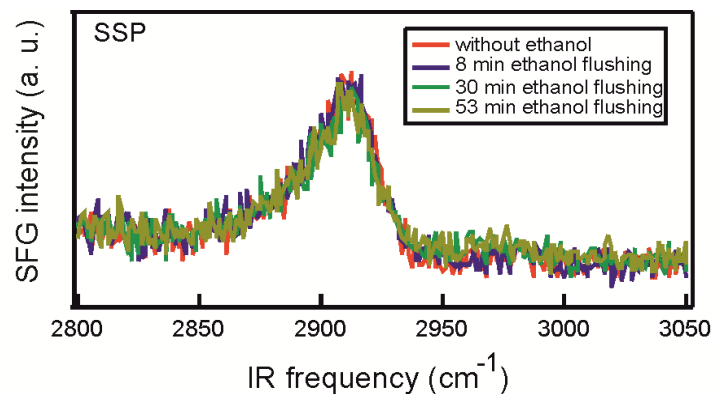

Figure 1. Sum-frequency spectrum (SSP polarization) of the PDMS-air interface without and with flushing of ethanol vapour over it.

Figure 1 depicts in red the sum-frequency spectrum for the PDMS-air interface. The spectrum consists of one peak at  $\sim 2910\text{ cm}^{-1}$ , assigned to the symmetric C-H stretch mode of the methyl groups (reference: Soft Matter 5 (2009) 3487). The asymmetric stretch mode at around  $2970\text{ cm}^{-1}$  is only observed under PPP, PSS, and SPS polarization. Upon introducing ethanol vapour in the sample cell the SFG spectrum does not change: there is no vibrational resonance observed of ethanol both in the CH and OH (data not shown) spectral range. Also in PPP polarization no signals belonging to ethanol are observed. Clearly the ethanol does not stick to the hydrophobic PDMS surface.

2. The plot of  $h'/r$  defined by eqn. 19 versus different relative vapour pressures of ethanol.

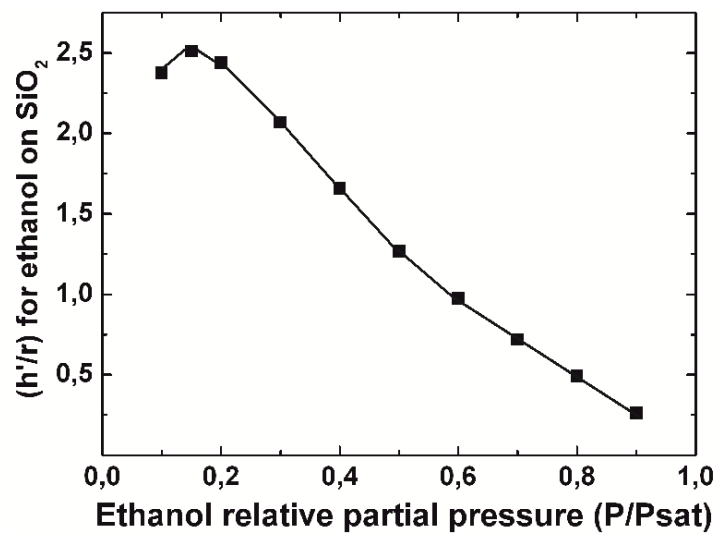

**Figure 2.** Ratio of ethanol physisorbed thickness ( $h'$ ) on  $\text{SiO}_2$  surface (eq. 15) to ethanol meniscus radius ( $r$ ) calculated from Kelvin equation at corresponding  $P/P_{sat}$  (eq. 2).

**3. The values of meniscus radius as well as Laplace pressure at different relative vapor pressures of ethanol.**

Table 1.  $P/P_{\text{sat}}$  – versus-meridional radius of meniscus and Laplace pressure

| <b>Ethanol <math>P/P_{\text{sat}}</math></b> | <b>Meridional radius of meniscus (nm)</b> |
|----------------------------------------------|-------------------------------------------|
| <b>0.1</b>                                   | 0.22                                      |
| <b>0.2</b>                                   | 0.32                                      |
| <b>0.3</b>                                   | 0.43                                      |
| <b>0.4</b>                                   | 0.56                                      |
| <b>0.5</b>                                   | 0.75                                      |
| <b>0.6</b>                                   | 1.01                                      |
| <b>0.7</b>                                   | 1.45                                      |
| <b>0.8</b>                                   | 2.32                                      |
| <b>0.9</b>                                   | 4.92                                      |
| <b>Ethanol <math>P/P_{\text{sat}}</math></b> | <b>Laplace pressure (MPa)</b>             |
| <b>0.1</b>                                   | 99.864                                    |
| <b>0.2</b>                                   | 68.656                                    |
| <b>0.3</b>                                   | 51.093                                    |
| <b>0.4</b>                                   | 39.232                                    |
| <b>0.5</b>                                   | 29.293                                    |
| <b>0.6</b>                                   | 19.970                                    |
| <b>0.7</b>                                   | 15.152                                    |
| <b>0.8</b>                                   | 9.470                                     |
| <b>0.9</b>                                   | 4.465                                     |
